# Supplementary material
Source: PubMed Central journal article supplement (PMC10250305)
Supplement: 41431_2023_1302_MOESM7_ESM.pdf [file 41431_2023_1302_MOESM7_ESM.pdf]

**Rare-variant association analysis of age-related hearing loss reveals known and new hearing loss genes.**

Diana M. Cornejo-Sanchez, PhD, Guangyou Li, MSc, Tabassum Fabiha, Ran Wang, MSc, Anushree Acharya, MSc, Jenna L Everard, Magda K Kadlubowska, BS, Yin Huang, PhD, Isabelle Schrauwen, PhD, Gao T. Wang, PhD, Andrew T. DeWan, PhD, Suzanne M. Leal, PhD.

The supplementary information contains 10 figures (supplied in pdf format) and 6 tables (supplied in xlsx format). The description of each table or figure is supplied in their title.
