# Supplementary material
Source: PubMed Central journal article supplement (PMC10250305)
Supplement: 41431_2023_1302_MOESM8_ESM.pdf [file 41431_2023_1302_MOESM8_ESM.pdf]

**Rare-variant association analysis of age-related hearing loss reveals known and new hearing loss genes.**

Diana M. Cornejo-Sanchez, PhD, Guangyou Li, MSc, Tabassum Fabiha, Ran Wang, MSc, Anushree Acharya, MSc, Jenna L Everard, Magda K Kadlubowska, BS, Yin Huang, PhD, Isabelle Schrauwen, PhD, Gao T. Wang, PhD, Andrew T. DeWan, PhD, Suzanne M. Leal, PhD.

The supplementary information contains 10 figures (supplied in pdf format) and 6 tables (supplied in xlsx format). The description of each table or figure is supplied in their title.

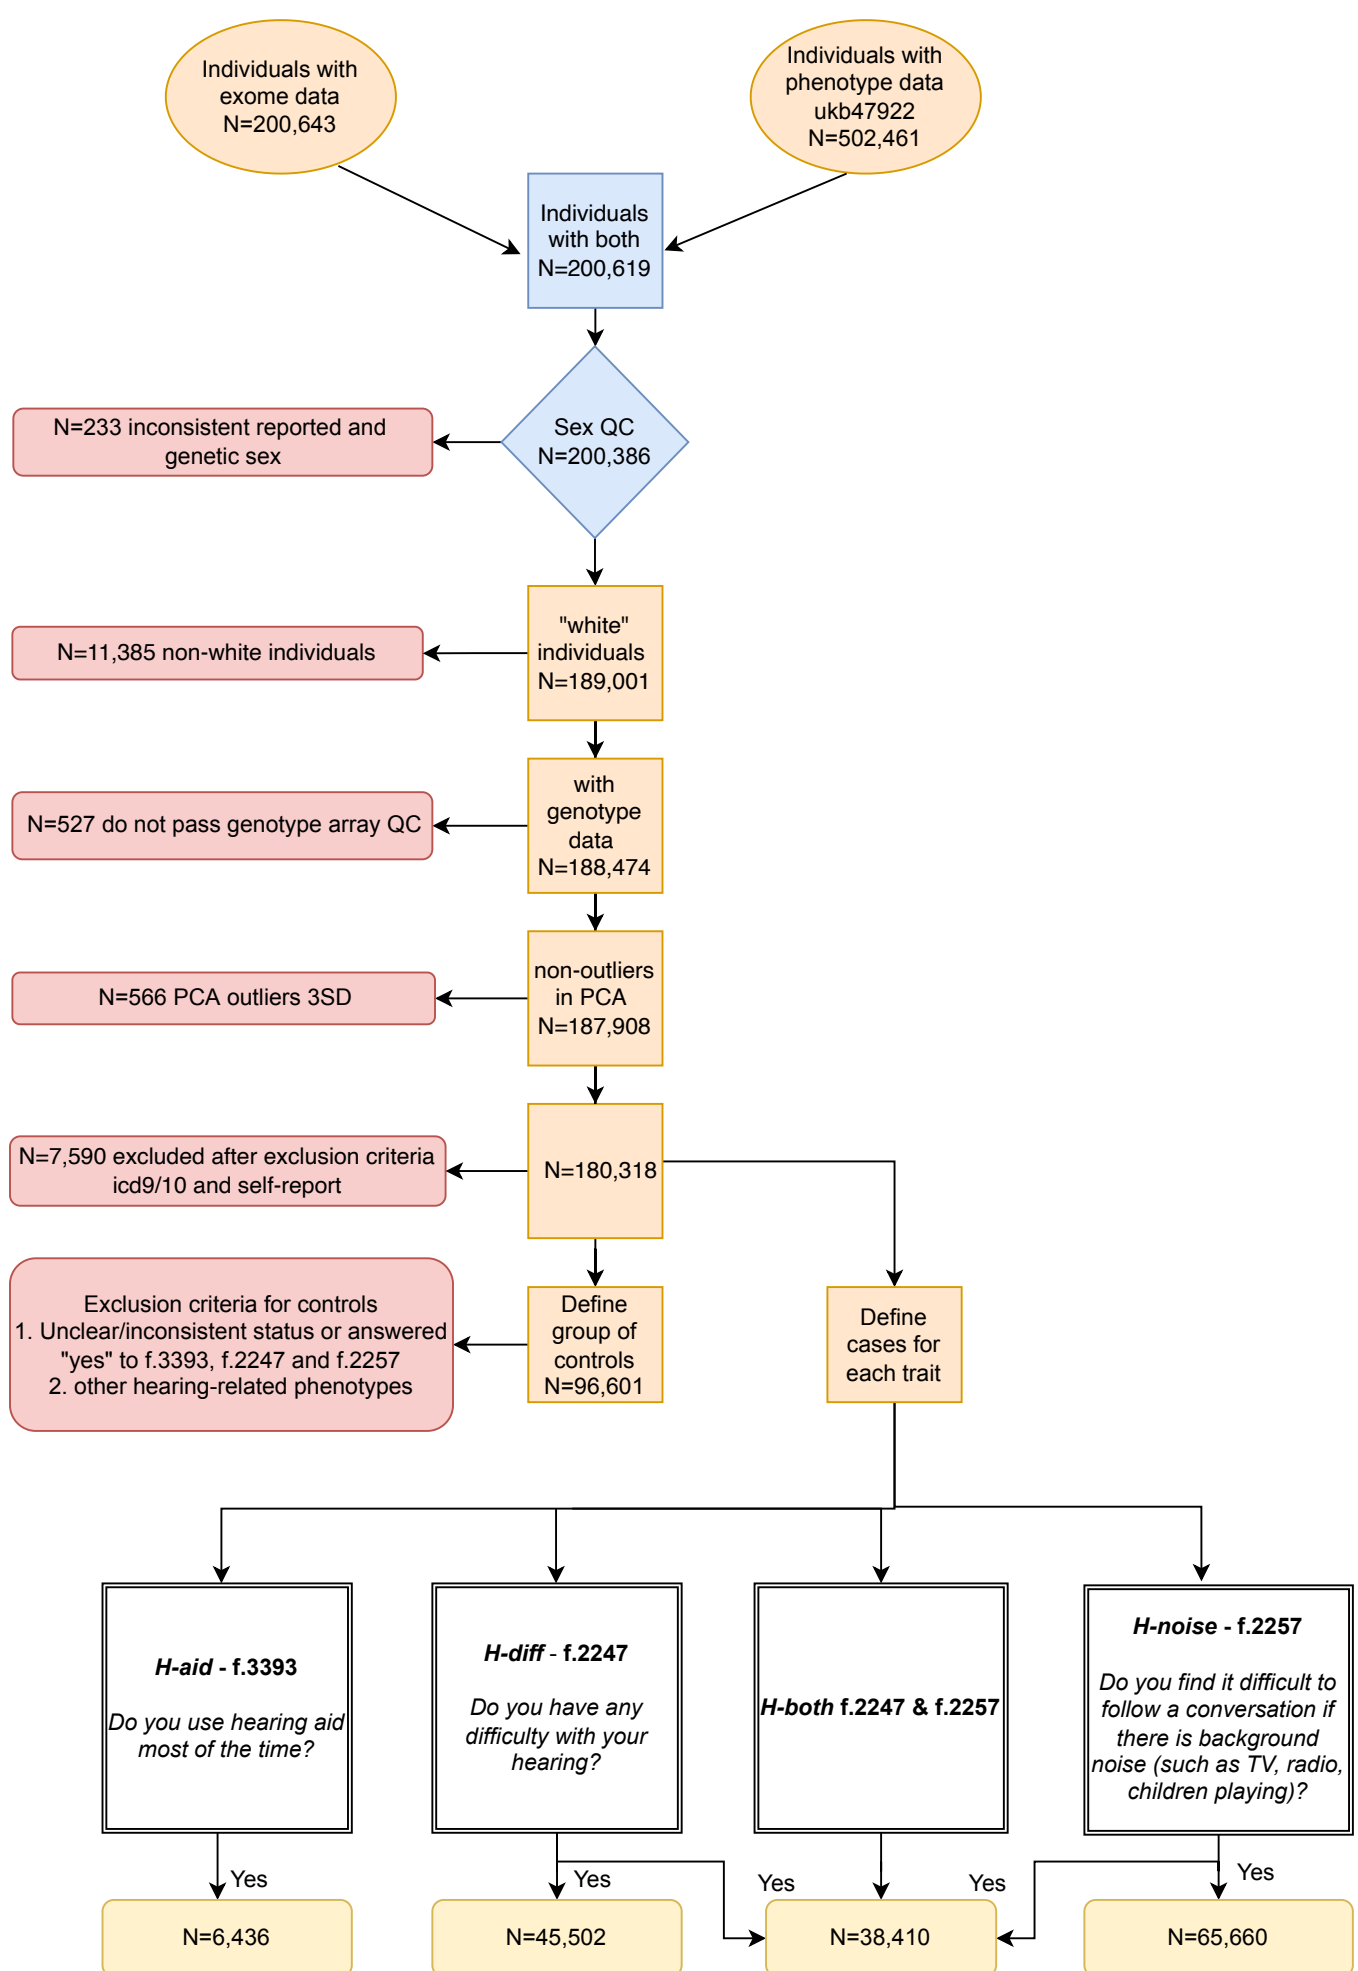

**Figure S1. Phenotype definition of age-related hearing traits for individuals with exome sequence data for the mega-sample.**

*H-aid*: hearing aid, *H-diff*: hearing difficulty, *H-both*: hearing difficulty and hearing difficulty with background noise, *H-noise*: hearing difficulty with background noise, QC: quality control, PCA: principal component analysis, SD: standard deviation

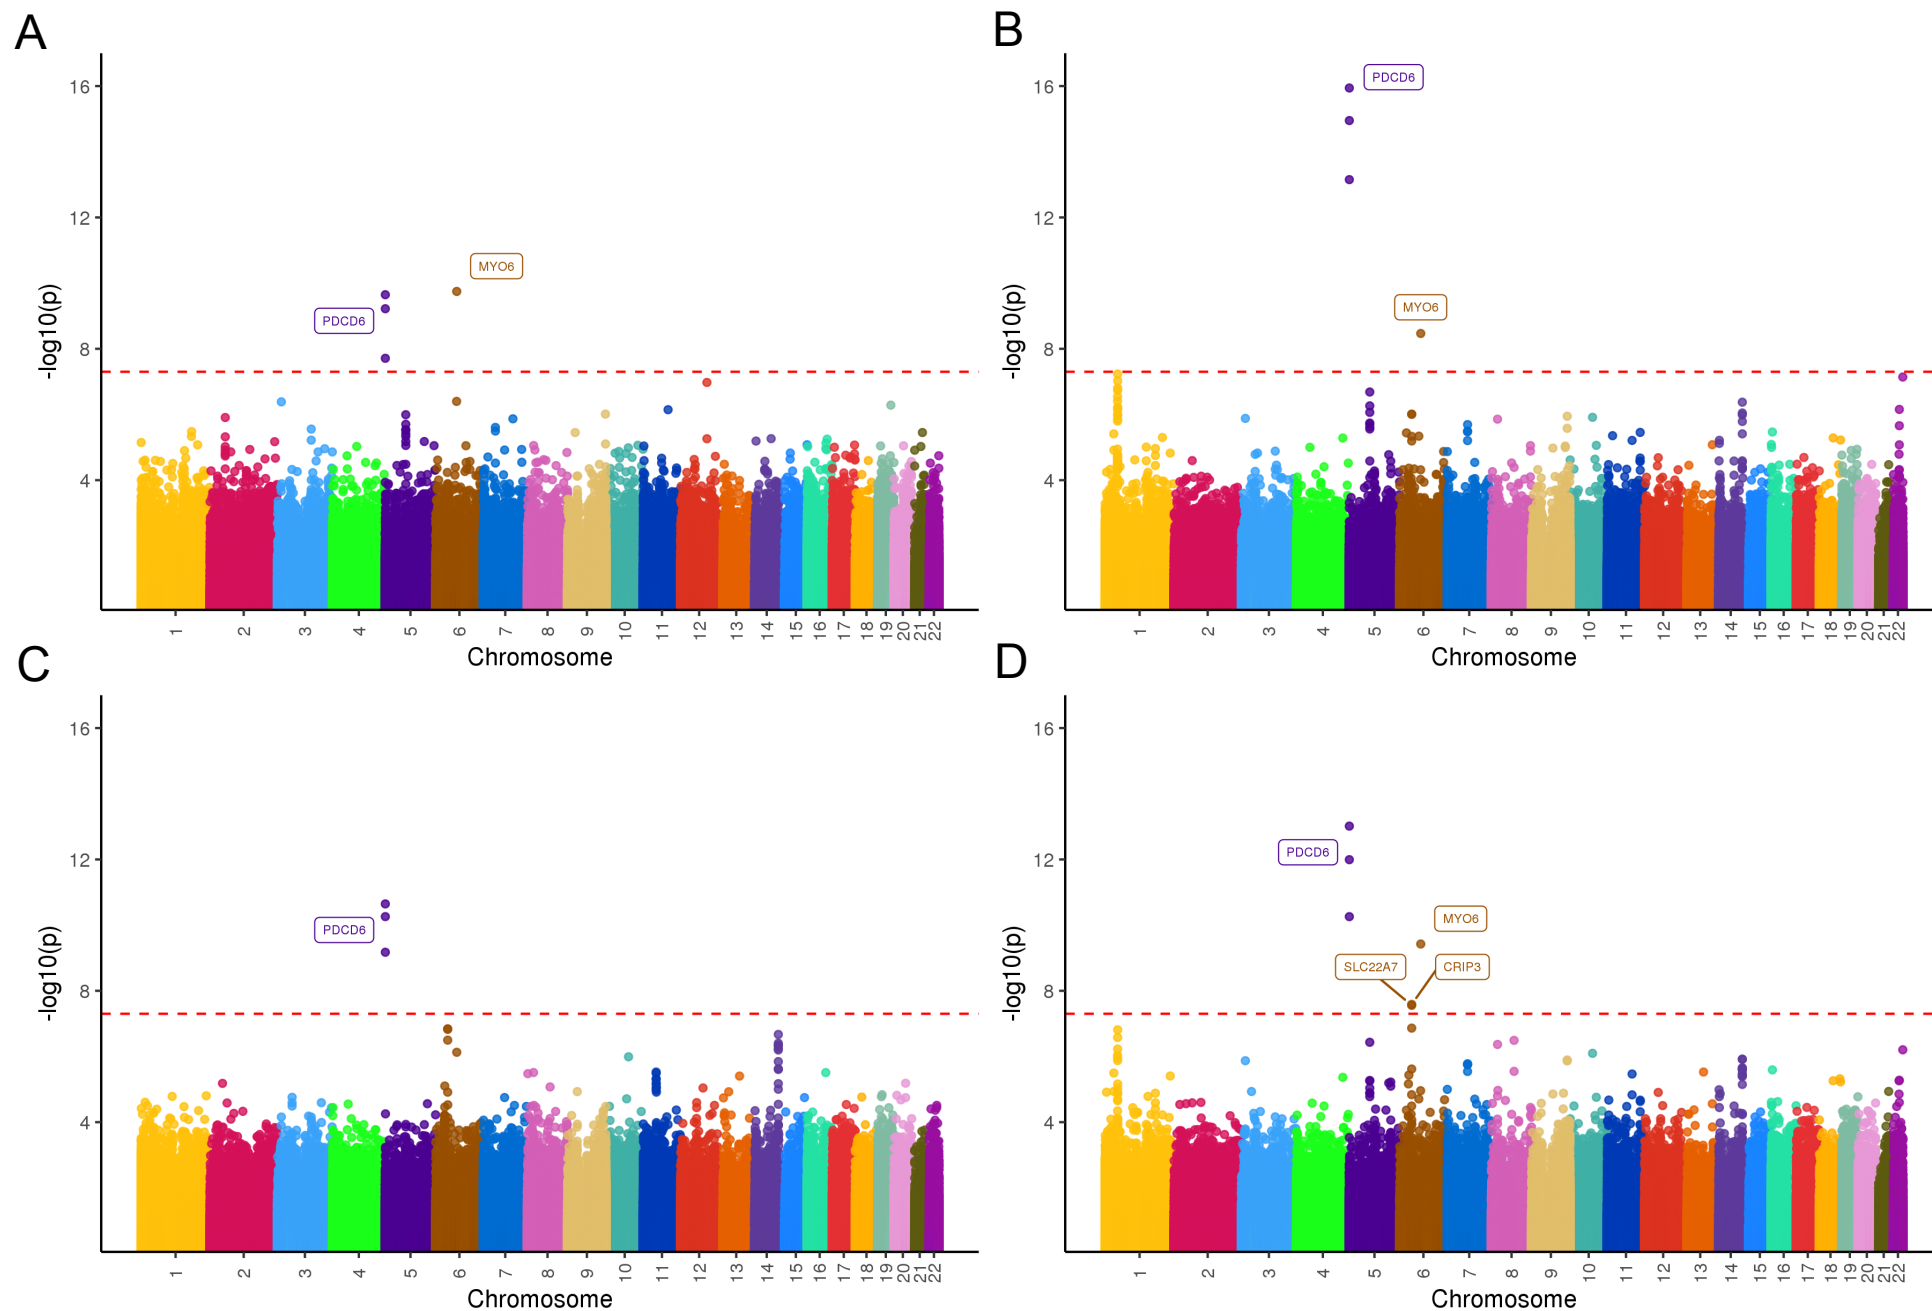

**Figure S2 Single variant association analysis Manhattan plots for the discovery sample.** Results are shown for the analysis of A) *H-aid*, B) *H-diff*, C) *H-noise* and D) *H-both*. The threshold for genome-wide significance ( $p < 5.0 \times 10^{-8}$ ) is indicated by a red dotted line. Loci that reached genome-wide significance are annotated with the gene label.

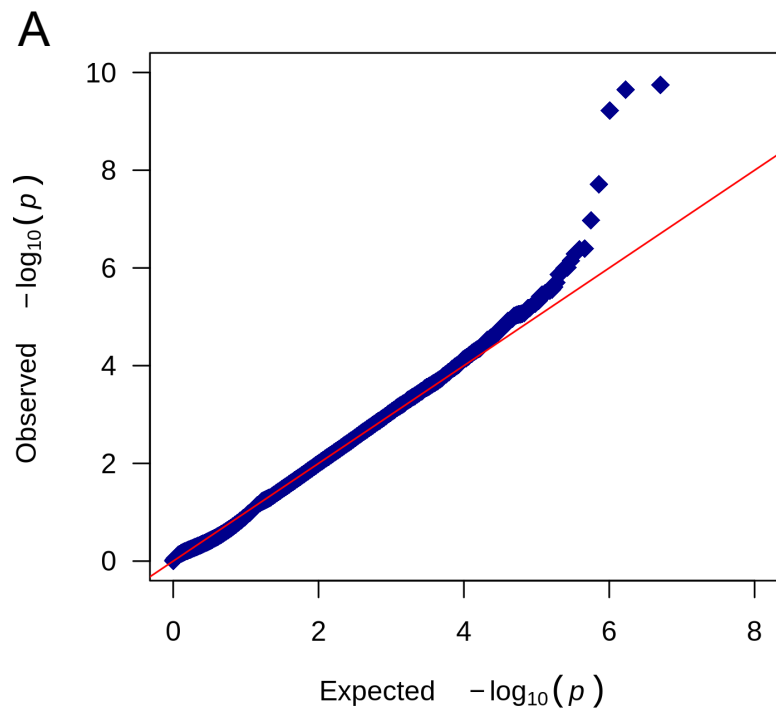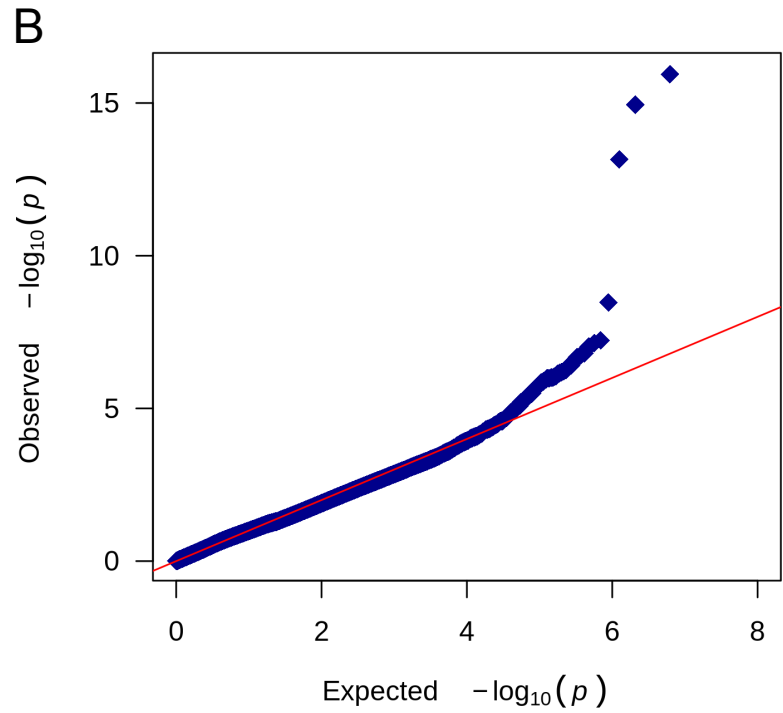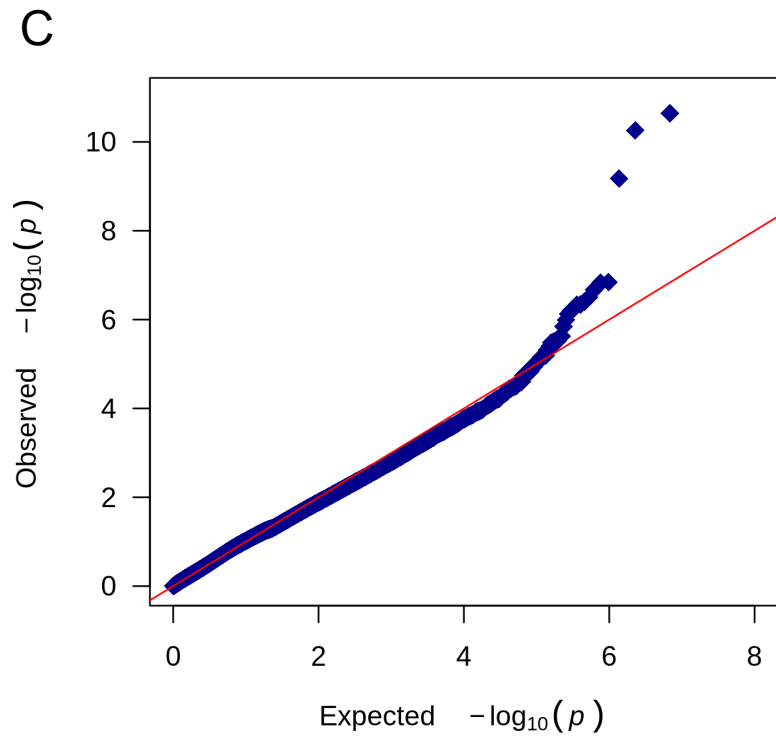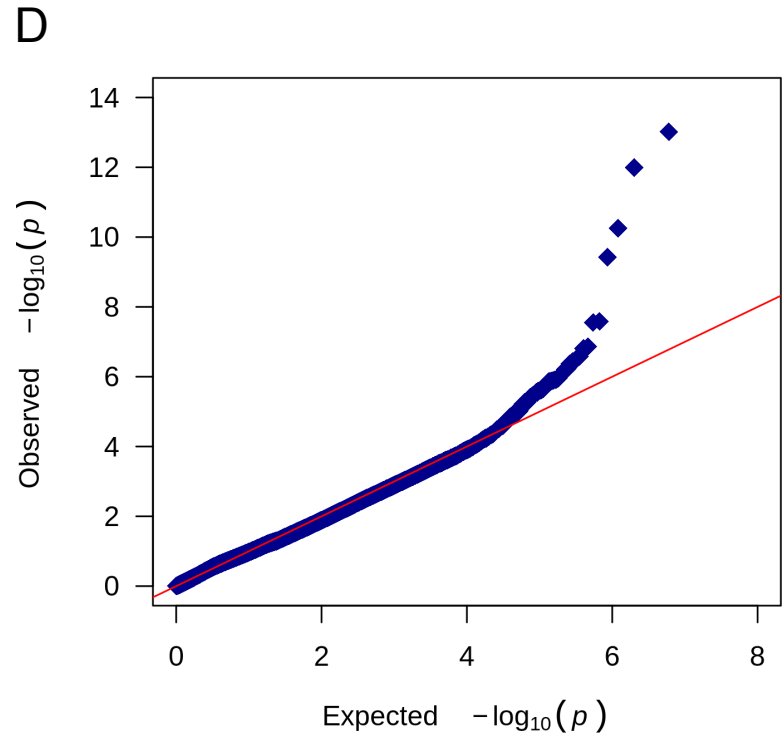

**Figure S3 Single variant association analysis Quantile-Quantile (Q-Q) plots for the discovery sample.** Results are shown for the analysis of A) *H-aid* ( $\lambda=0.90$ ), B) *H-diff* ( $\lambda=1.05$ ), C) *H-noise* ( $\lambda=1.05$ ) and D) *H-both* ( $\lambda=1.08$ ).

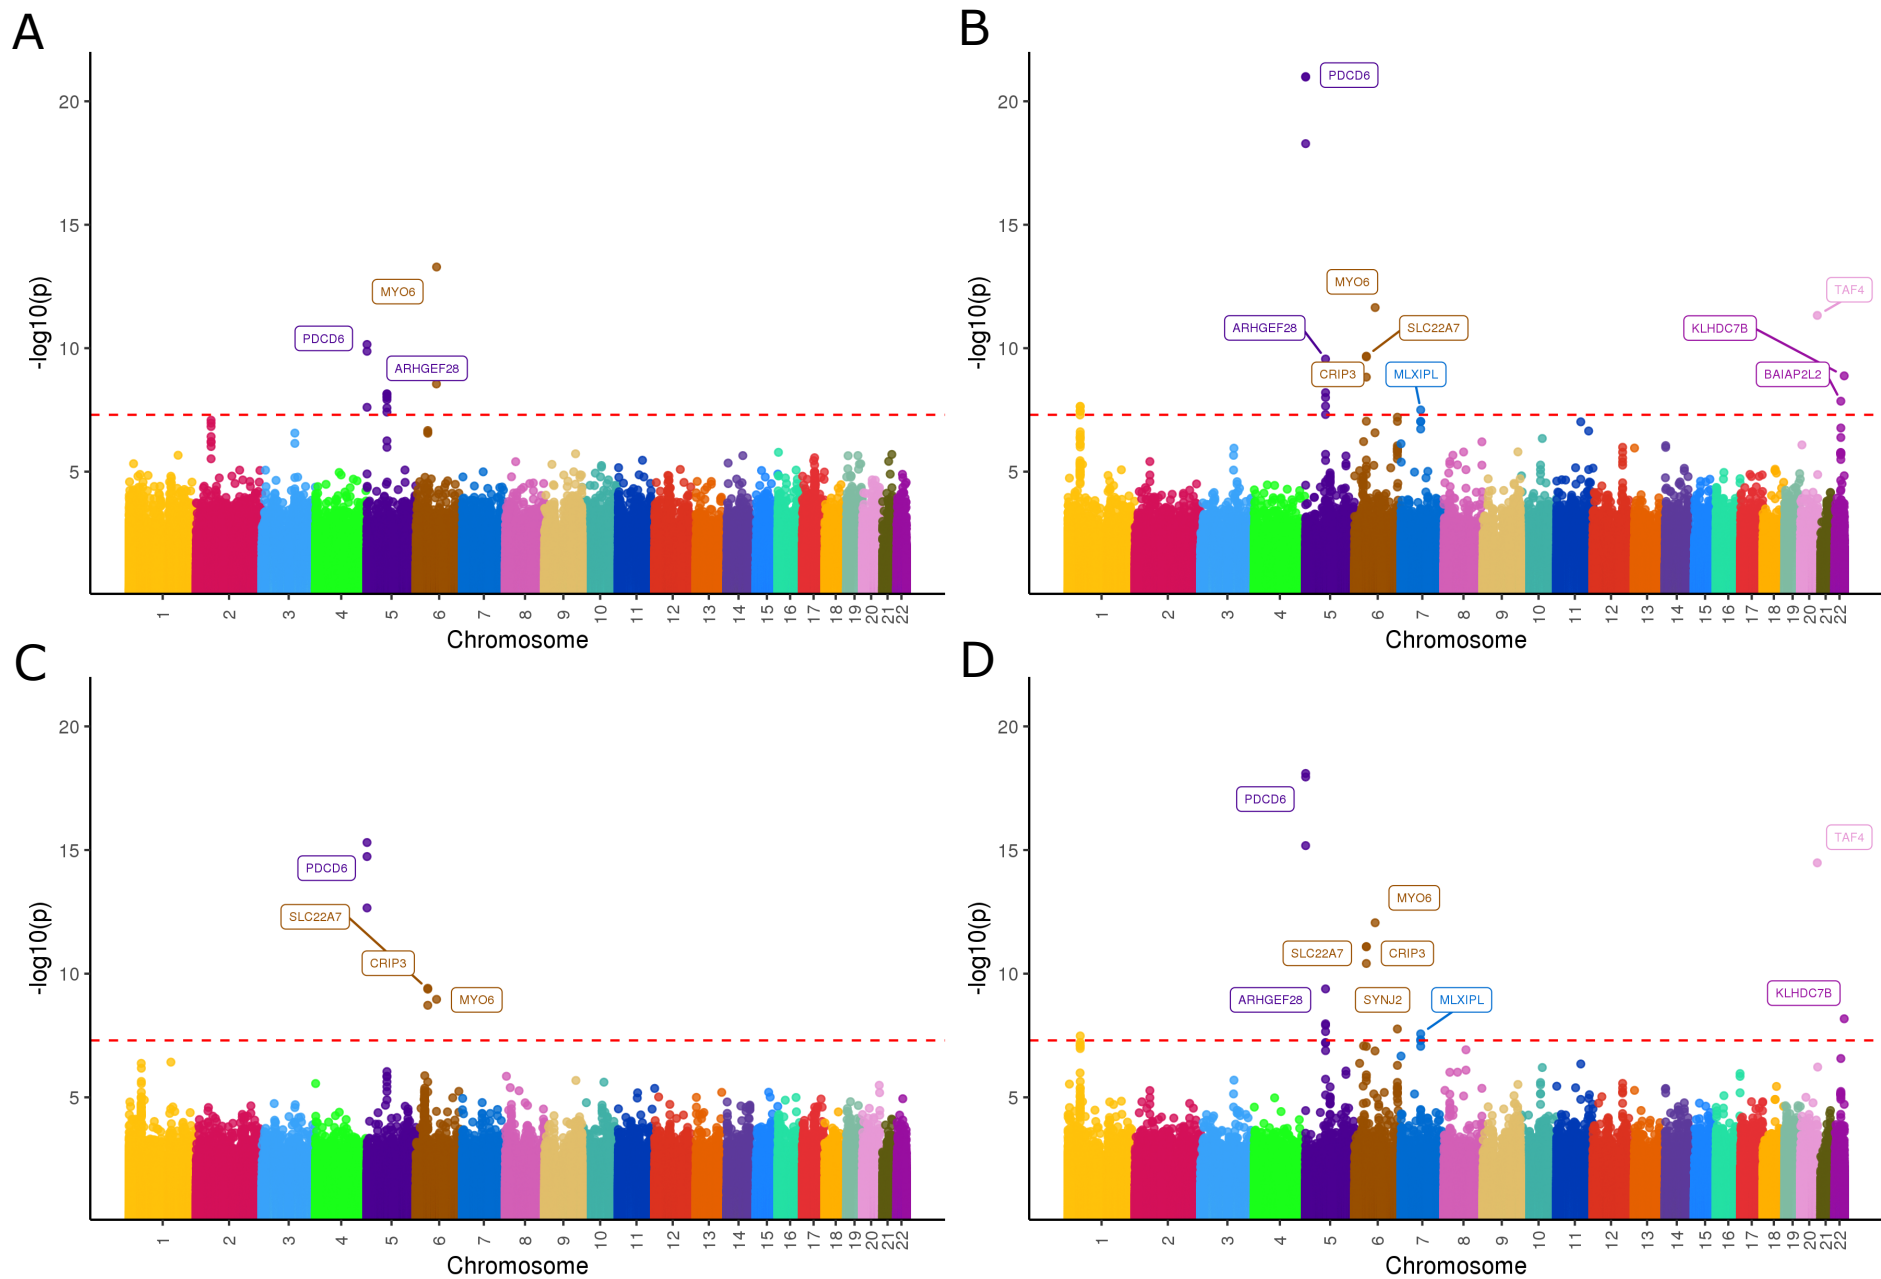

**Figure S4 Single variant association analysis Manhattan plots for the mega-sample.** Results are shown for the analysis of A) *H-aid*, B) *H-diff*, C) *H-noise* and D) *H-both*. The threshold for genome-wide significance ( $p < 5.0 \times 10^{-8}$ ) is indicated by a red dotted line. Loci that reached genome-wide significance are annotated with the gene label.

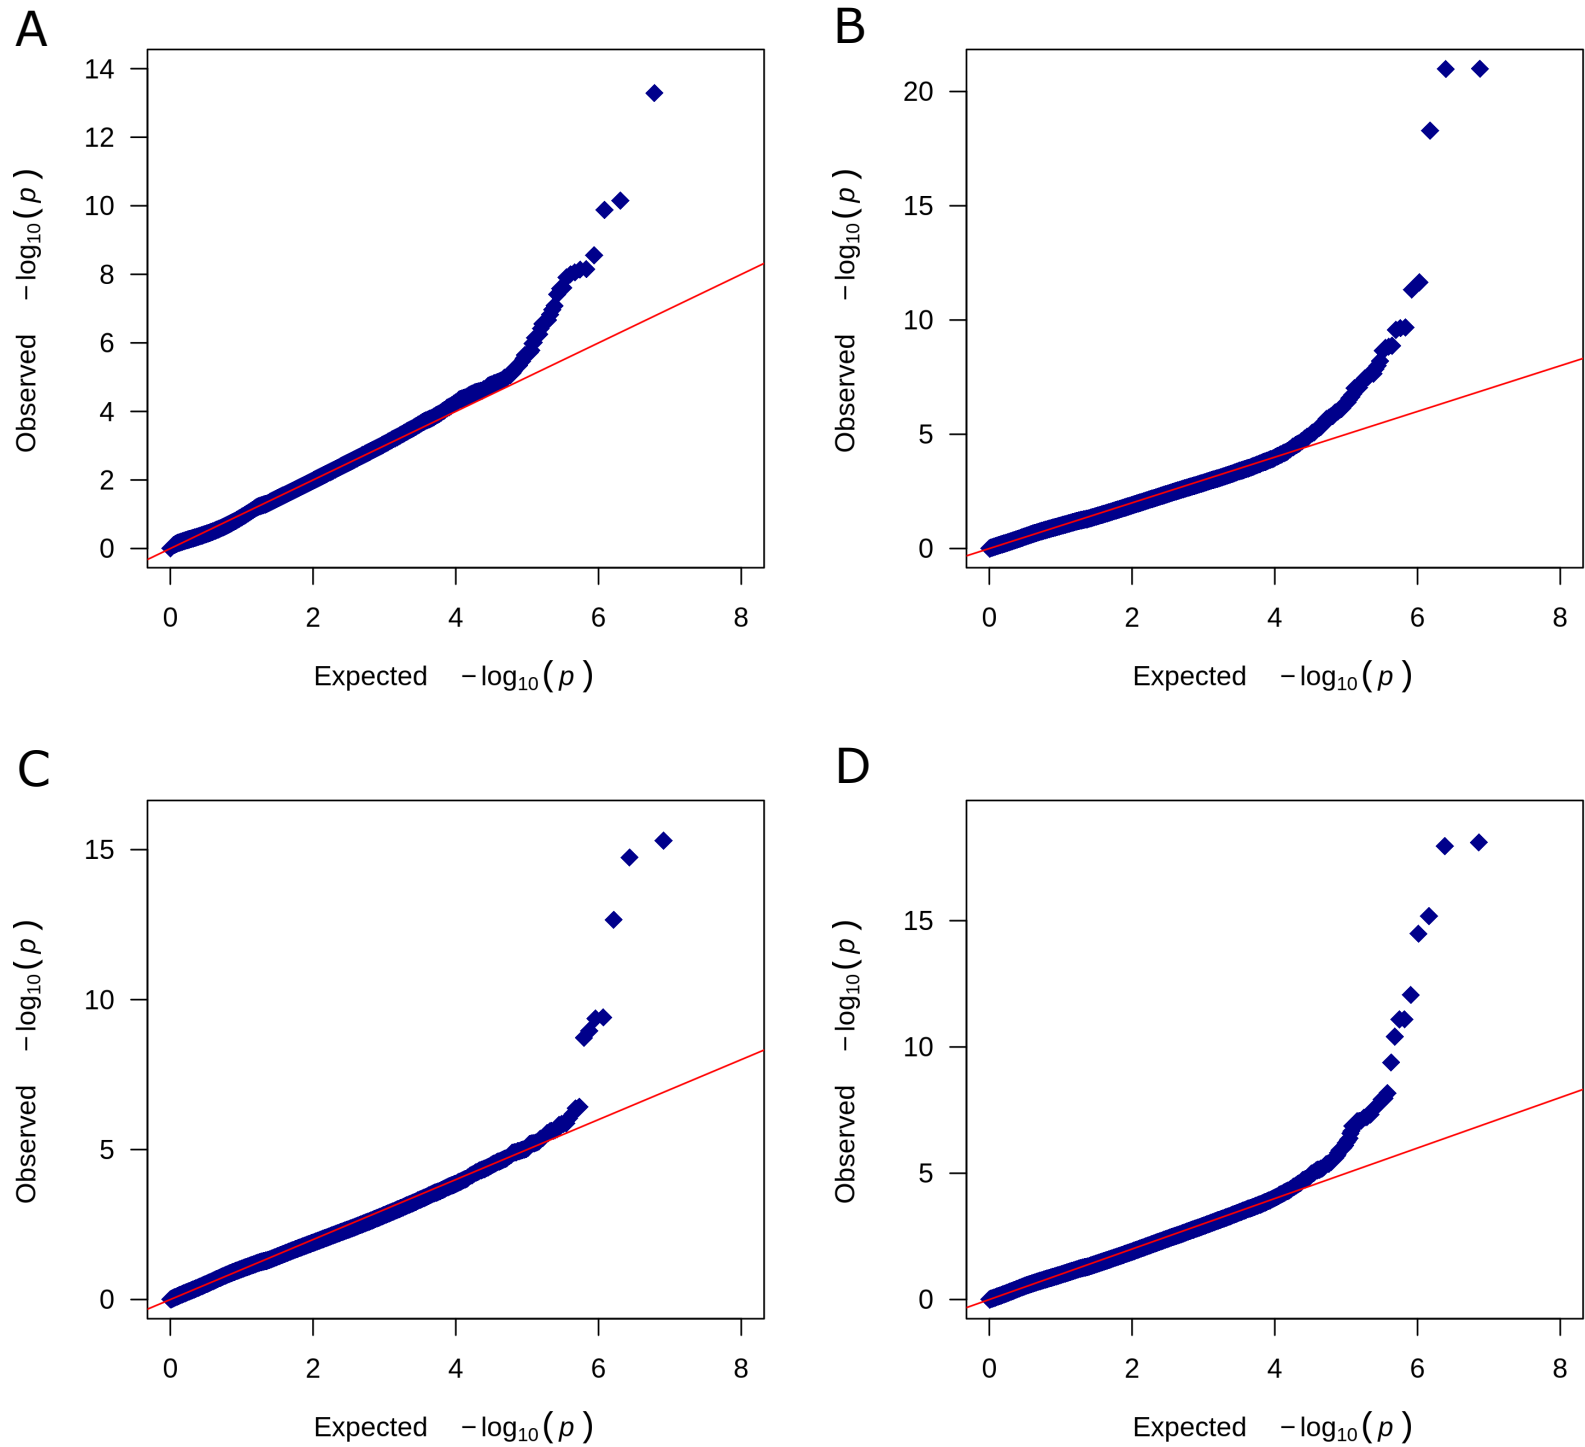

**Figure S5 Single variant association analysis Quantile-Quantile (Q-Q) plots for the mega-sample.** Results are shown for the analysis of A)  $H\text{-aid}$  ( $\lambda=0.94$ ), B)  $H\text{-diff}$  ( $\lambda=1.04$ ), C)  $H\text{-noise}$  ( $\lambda=1.05$ ) and D)  $H\text{-both}$  ( $\lambda=1.07$ ).

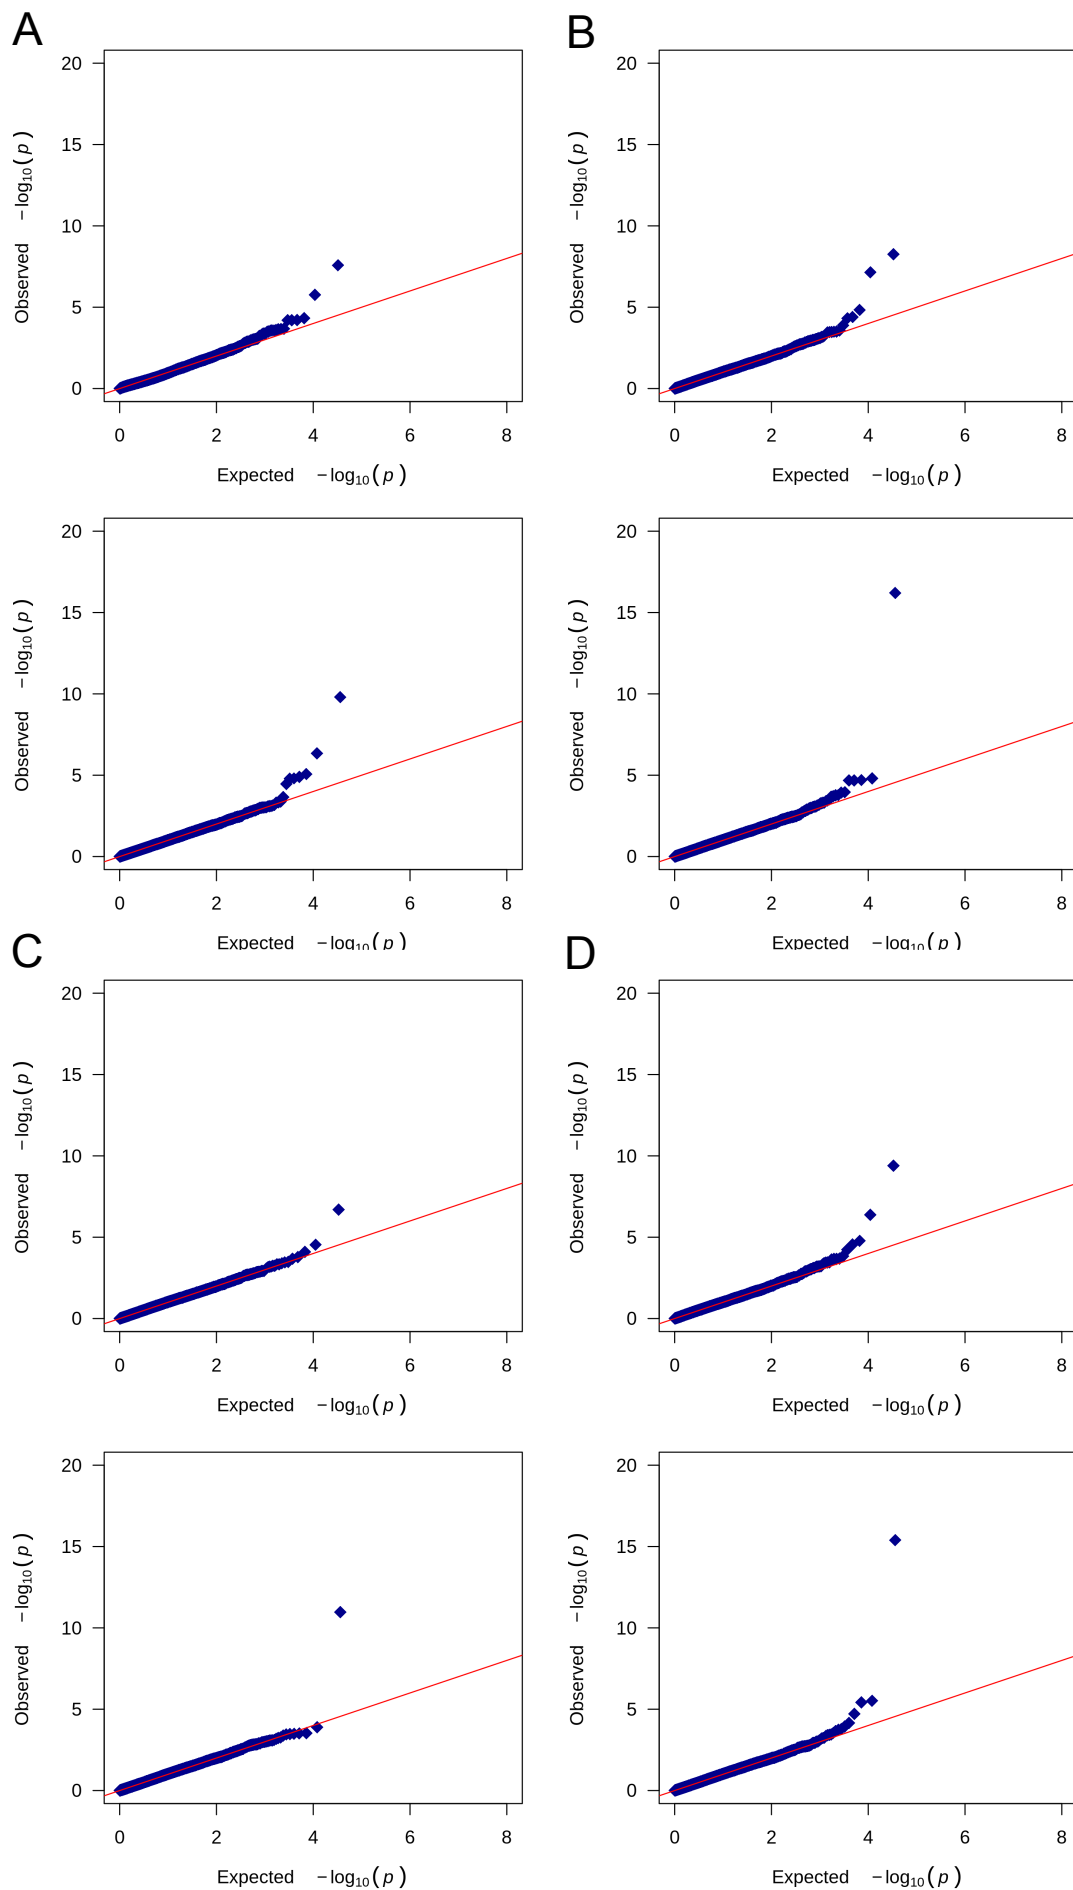

**Figure S6 Rare-variant aggregate association analysis Quantile-Quantile (Q-Q) plots for the discovery sample.** Results are shown for the analysis of A) *H-aid* (top  $\lambda=0.95$ ; bottom  $\lambda=0.99$ ), B) *H-diff* (top  $\lambda=1.09$ ; bottom  $\lambda=1.04$ ), C) *H-noise* (top  $\lambda=1.03$ ; bottom  $\lambda=1.00$ ) and D) *H-both* (top  $\lambda=1.09$ ; bottom  $\lambda=1.02$ ). For each panel the top half displays the result for the analysis of predicted loss of function (pLoF) variants and bottom half for missense and pLoF variants.

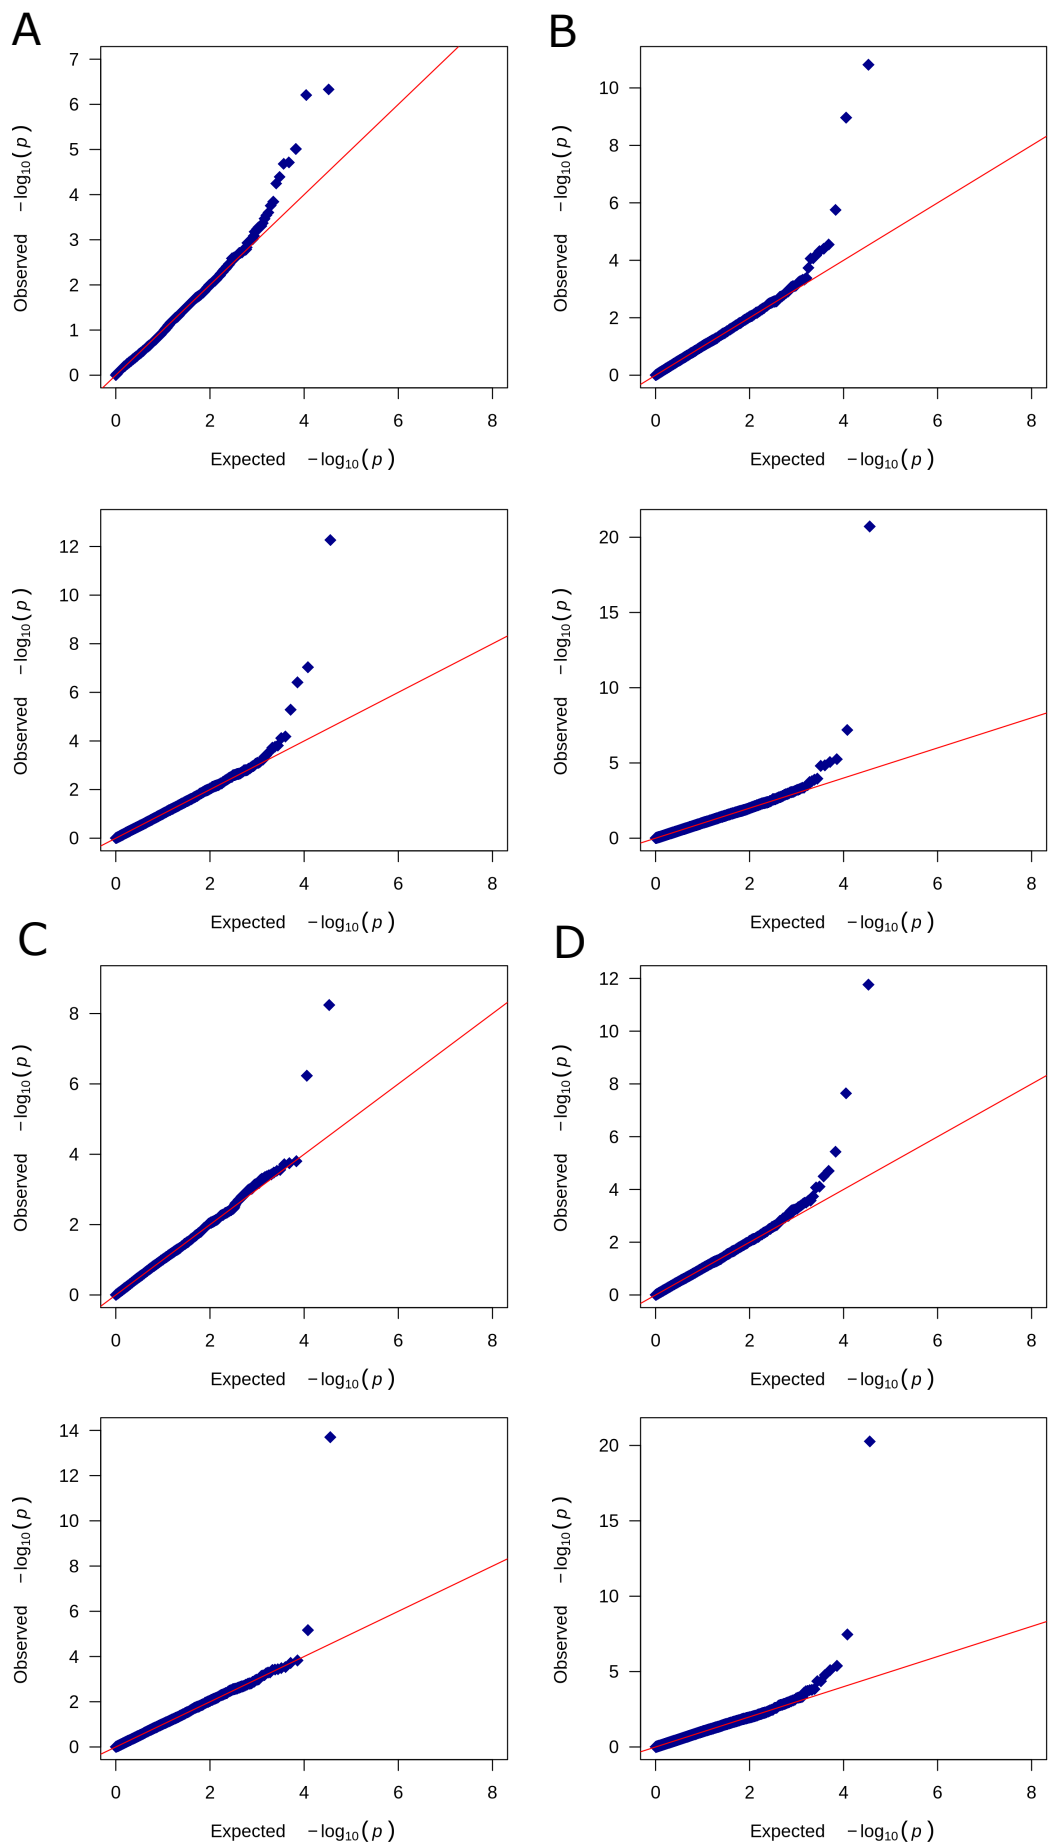

**Figure S7 Rare-variant aggregate association analysis Quantile-Quantile (Q-Q) plots for the mega-sample.** Results are shown for the analysis of A) *H-aid* (top  $\lambda=0.98$ ; bottom  $\lambda=1.01$ ), B) *H-diff* (top  $\lambda=1.04$ ; bottom  $\lambda=1.04$ ), C) *H-noise* (top  $\lambda=1.04$ ; bottom  $\lambda=1.03$ ) and D) *H-both* (top  $\lambda=1.06$ ; bottom  $\lambda=1.03$ ). For each panel the top half displays the result for the analysis of predicted loss of function (pLoF) variants and bottom half for missense and pLoF variants.



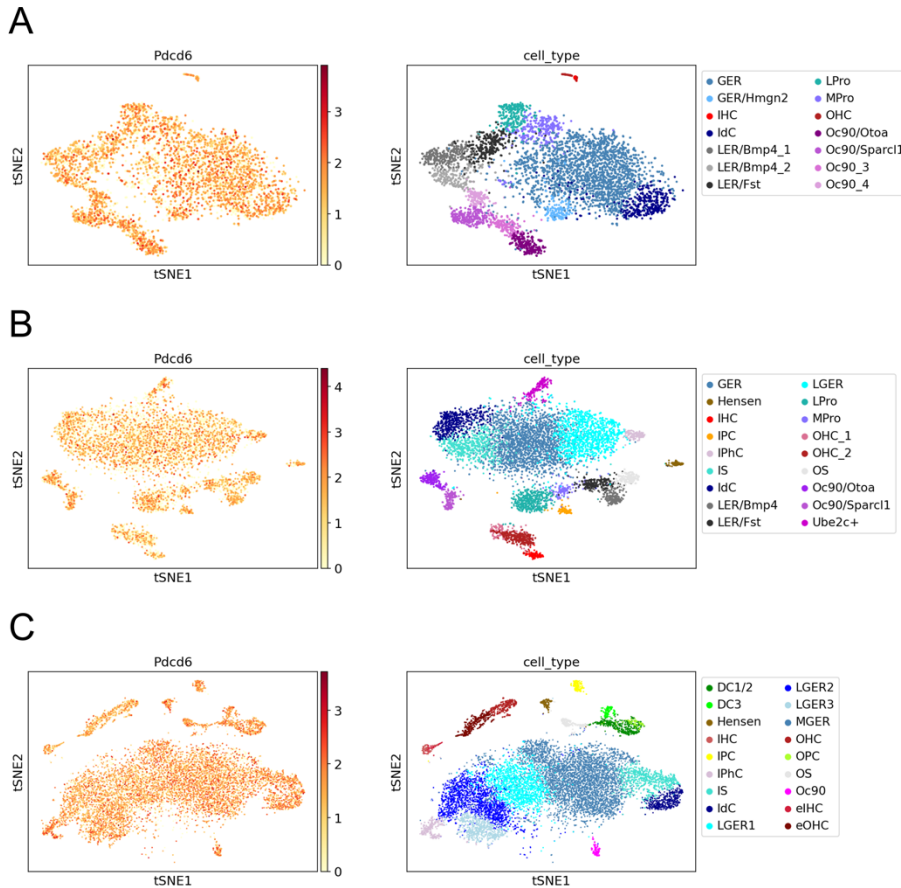

**Figure S8 Single cell expression of *Pcd66* in the cochlear floor epithelia during mouse development.** *Pcd66* expression is presented both in terms of its expression levels (left panel; red = high expression, yellow = low expression) and its location in the cochlear floor epithelium (right panel; colors indicate the cell type) at three developmental stages: **A.** E14, **B.** E16, and **C.** P1. The scale bar represents gene expression based on log transformed and normalized expression data. *Pcd66* is widely expressed in the cochlear floor epithelia during various stages of development. Data is from a single cell RNA sequencing dataset of the cochlear floor epithelia of CD1 mice(1) and were obtained and plotted using the gEAR analysis suite (gene Expression Analysis Resource)(2).

**Abbreviations:**

Developing Supporting Cells: GER: Greater Epithelial Range; GER/Hmgn2: Greater Epithelial Range expressing Hmgn2; IdC: Interdental Cells; LER/Bmp4\_1: Lesser Epithelial Ridge Cells Expressing Bmp4; LER/Bmp4\_2: Lesser Epithelial Ridge Cells Expressing Bmp4; LER/Fst: Lesser Epithelial Ridge Cells Expressing Fst; Oc90: Cells expressing Oc90; Oc90/Otoa: Cells expressing Oc90 and Otoa; Oc90/Sparcl1: Cells expressing Oc90 and Sparcl1; Oc90\_3: Cells expressing Oc90; Oc90\_4: Cells expressing Oc90; OS: Outer Sulcus Cells; IS: Inner Sulcus Cells; IPhC: Inner Phalangeal Cells; IPC: Inner Pillar Cells; OPC: Outer Pillar Cells; Hensen: Hensen Cells; DC: Dieter Cells; DC1/2: Dieter Cells from rows 1 and 2; DC3: Dieter Cells from row 3; BM: Basilar Membrane Cells; Glia: Glial Cells; Developing Prosensory Cells: LPro: Lateral Prosensory Cells; MPro: Medial Prosensory Cells. Developing Greater Epithelial Ridge Cells: LGER1: Lateral Great Epithelial Ridge Cells, group 1; LGER2: Lateral Great Epithelial Ridge Cells, group 2; LGER3: Lateral Great Epithelial Ridge Cells, group 3; MGER: Medial Greater Epithelial Ridge Cells; MLGER: Medial Lateral Greater Epithelial Ridge Cells; Developing Sensory Cells: IHC: Inner Hair Cells; OHC: Outer Hair Cells; OHC\_1: More mature developing outer hair cells; OHC\_2: Less mature developing outer hair cells. eIHC: Less mature developing inner hair cells; eOHC: Less mature developing outer hair cells; Uncategorized: Ube2c+: Unannotated cells expressing Ube2c+.

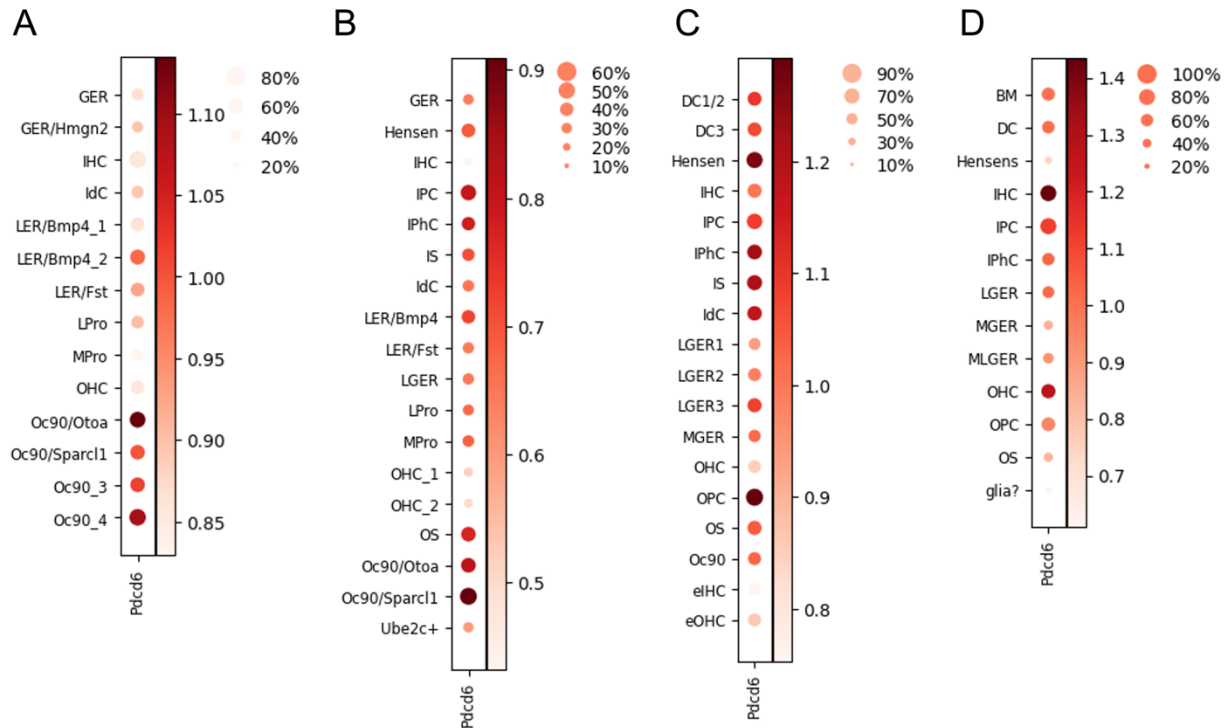

**Figure S9 Expression of *Pdc6* in the cochlear floor epithelia during mouse development per cell type/cluster.** Log-transformed and normalized expression levels of *Pdc6* are indicated for each cell type/cluster in the cochlear floor sensory epithelia of developing mice, with the dot size indicating the percentage of cells expressing *Pdc6* and the color indicating the intensity of this expression (red = high expression, white = low expression). Expression is shown at four developmental stages: **A.** E14, **B.** E16, **C.** P1, **D.** P7. These plots illustrate that both the expression intensity of *Pdc6* and the percentage of cells expressing *Pdc6* generally increase as development progresses. There is an especially prominent upregulation of *Pdc6* in the Inner Hair Cells (IHC) from E16 through P7. A less prominent upregulation also occurs in the Outer Hair Cells (OHC). Data were obtained from gEAR and plots were generated using its analysis suite(2).

**Abbreviations:**

Developing Supporting Cells: GER: Greater Epithelial Range; GER/Hmgn2: Greater Epithelial Range expressing Hmgn2; IdC: Interdental Cells; LER/Bmp4\_1: Lesser Epithelial Ridge Cells Expressing Bmp4; LER/Bmp4\_2: Lesser Epithelial Ridge Cells Expressing Bmp4; LER/Fst: Lesser Epithelial Ridge Cells Expressing Fst; Oc90: Cells expressing Oc90; Oc90/Otoa: Cells expressing Oc90 and Otoa; Oc90/Sparc1: Cells expressing Oc90 and Sparc1; Oc90\_3: Cells expressing Oc90; Oc90\_4: Cells expressing Oc90; OS: Outer Sulcus Cells; IS: Inner Sulcus Cells; IPhC: Inner Phalangeal Cells; IPC: Inner Pillar Cells; OPC: Outer Pillar Cells; Hensen: Hensen Cells; DC: Dieter Cells; DC1/2: Dieter Cells from rows 1 and 2; DC3: Dieter Cells from row 3; BM: Basilar Membrane Cells; Glia: Glial Cells; Developing Prosensory Cells: LPro: Lateral Prosensory Cells; MPro: Medial Prosensory Cells. Developing Greater Epithelial Ridge Cells: LGER1: Lateral Great Epithelial Ridge Cells, group 1; LGER2: Lateral Great Epithelial Ridge Cells, group 2; LGER3: Lateral Great Epithelial Ridge Cells, group 3; MGER: Medial Greater Epithelial Ridge Cells; MLGER: Medial Lateral Greater Epithelial Ridge Cells; Developing Sensory Cells: IHC: Inner Hair Cells; OHC: Outer Hair Cells; OHC\_1: More mature developing outer hair cells; OHC\_2: Less mature developing outer hair cells. eIHC: Less mature developing inner hair cells; eOHC: Less mature developing outer hair cells; Uncategorized: Ube2c+: Unannotated cells expressing Ube2c+.

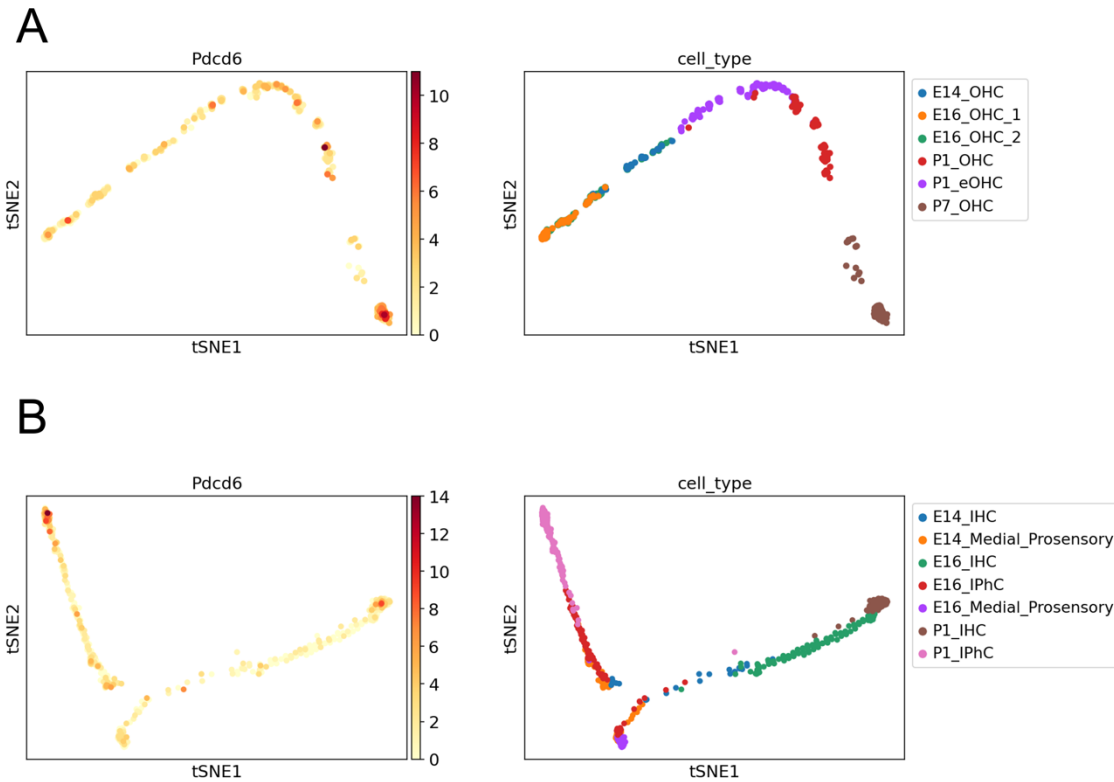

**Figure S10 *Pcd6* expression trajectories in Outer Hair Cells (OHC) and Inner Hair Cells (IHC).** *Pcd6* expression levels from a single cell dataset of the cochlear floor sensory epithelia of the developing mice, presented for OHC and IHC (log-transformed and normalized)(1). The scale bar represents gene expression ranging from low-yellow to high-red based expression data. **A.** *Pcd6* raw expression values as determined by differential expression analysis (left) compared with OHC trajectories during E14-P7. The highest expression values occur in the mature OHC during P7. **B.** *Pcd6* raw expression values as determined by differential expression analysis (left) compared with IHC, IPhC, and medial prosensory trajectories during E14-P1. Expression of *Pcd6* is greatest in P1 in both IHC and IPhC, exhibiting low expression levels everywhere else. Data were obtained and generated with the gEAR analysis suite (2)

Abbreviations IHC: E14\_IHC: Early developing inner hair cells E14; E14\_Medial\_Prostnsory: Developing medial prosensory cells E14; E16\_IHC: Developing inner hair cells E16; E16\_IPhC: Developing inner phalangeal cells E16; E16\_Medial\_Prostnsory: Developing medial prosensory cells E16; P1\_IHC: Developing inner hair cells P1; P1\_IPhC: Developing inner phalangeal cells P1. Abbreviations OHC: E14\_OHC: Early developing outer hair cells E14; E16\_OHC\_1: More mature developing outer hair cells E16; E16\_OHC\_2: Less mature developing outer hair cells E16; P1\_OHC: More mature developing outer hair cells P1; P1\_eOHC: Less mature developing outer hair cells P1; P7\_OHC: Developing outer hair cells P7.

## References

1. Kolla L, Kelly MC, Mann ZF, Anaya-Rocha A, Ellis K, Lemons A, et al. Characterization of the development of the mouse cochlear epithelium at the single cell level. *Nat Commun.* 2020;11(1):2389.
2. Orvis J, Gottfried B, Kancherla J, Adkins RS, Song Y, Dror AA, et al. gEAR: Gene Expression Analysis Resource portal for community-driven, multi-omic data exploration. *Nat Methods.* 2021;18(8):843–4.
